# Supplementary material
Source: Springer Nature journal article supplement (https://www.springermedizin.de/resource/supplementary/12987_2007_291_MOESM6_ESM.pdf/9611698)

# Histogram CSFP Across Population

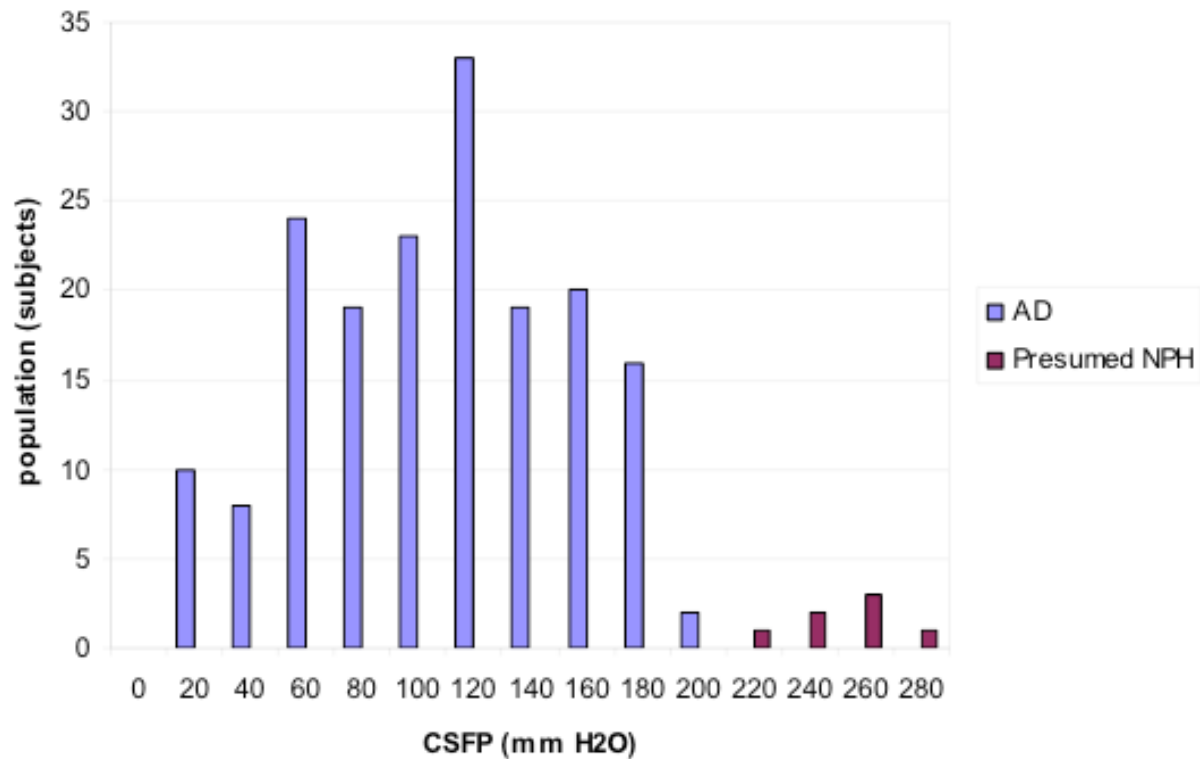

Supplement: MOESM6 [file 9611698]
